# Supplementary material for: Multi-faceted computational assessment of risk and progression in oligodendroglioma implicates NOTCH and PI3K pathways
Source: PubMed Central journal article supplement (PMC6219505; doi:10.1038/s41698-018-0067-9), 2018-11-06

**Table S1A.** Gene names and frequency of mutations for oligodendroglioma in the TCGA database.

| Gene Name  | Frequency of Mutations | Gene Name | Frequency of Mutations | Gene Name | Frequency of Mutations |
|------------|------------------------|-----------|------------------------|-----------|------------------------|
| IDH1       | 154                    | NRAS      | 2                      | ST3GAL6   | 1                      |
| CIC        | 104                    | OR4S2     | 2                      | STK19     | 1                      |
| FUBP1      | 45                     | OR5D18    | 2                      |           |                        |
| PI3K comb. | 37                     | PDGFRA    | 2                      | TEAD3     | 1                      |
| NOTCH1     | 32                     | SEMA3E    | 2                      | TREML2    | 1                      |
| PIK3CA     | 26                     | SPANXD    | 2                      | TRIM58    | 1                      |
| ZBTB20     | 16                     | TRPA1     | 2                      | TYRP1     | 1                      |
| IDH2       | 15                     | UGT2A3    | 2                      | ZPBP      | 1                      |
| PIK3R1     | 12                     | VSIG4     | 2                      |           |                        |
| ARID1A     | 11                     | ZNF709    | 2                      |           |                        |
| NF1        | 8                      | CDH18     | 1                      |           |                        |
| SMARCA4    | 7                      | DCAF12L2  | 1                      |           |                        |
| TP53       | 7                      | KRAS      | 1                      |           |                        |
| CREBZF     | 6                      | LZTR1     | 1                      |           |                        |
| TCF12      | 6                      | MED9      | 1                      |           |                        |
| ANKRD30A   | 5                      | MGAT4C    | 1                      |           |                        |
| RBPJ       | 5                      | OPRK1     | 1                      |           |                        |
| ATRX       | 4                      | OR2A12    | 1                      |           |                        |
| MYH4       | 4                      | OR2A25    | 1                      |           |                        |
| SOX4       | 4                      | OR4P4     | 1                      |           |                        |
| CDKN2C     | 3                      | OR8K3     | 1                      |           |                        |
| EGFR       | 3                      | OR9G1     | 1                      |           |                        |
| EMG1       | 3                      | P2RY11    | 1                      |           |                        |
| MYH8       | 3                      | PTEN      | 1                      |           |                        |
| SLC6A3     | 3                      | PTPN11    | 1                      |           |                        |
| ARL6       | 2                      | RAP2C     | 1                      |           |                        |
| CXorf22    | 2                      | RB1       | 1                      |           |                        |
| KEL        | 2                      | RPL5      | 1                      |           |                        |
| KPRP       | 2                      | SPTA1     | 1                      |           |                        |
| KRT15      | 2                      | SSTR4     | 1                      |           |                        |
| LHFPL1     | 2                      |           |                        |           |                        |

**Supplemental Table 1B.** Gain and loss of whole chromosome arms of oligodendroglioma within the TCGA database.

| <b>Chromosome</b> | <b>Loss</b> | <b>Gain</b> |
|-------------------|-------------|-------------|
| 1p                | 166         | 0           |
| 1q                | 12          | 1           |
| 4p                | 45          | 0           |
| 4q                | 50          | 0           |
| 7p                | 0           | 16          |
| 7q                | 0           | 24          |
| 9p                | 21          | 2           |
| 9q                | 15          | 3           |
| 11p               | 0           | 19          |
| 11q               | 0           | 24          |
| 12p               | 5           | 4           |
| 13q               | 28          | 0           |
| 14q               | 20          | 1           |
| 15q               | 27          | 0           |
| 17p               | 2           | 7           |
| 17q               | 1           | 8           |
| 18p               | 31          | 0           |
| 18q               | 33          | 0           |
| 19p               | 7           | 57          |
| 19q               | 167         | 0           |
| 21q               | 2           | 9           |
| 22q               | 4           | 17          |
| Xp                | 33          | 0           |
| Xq                | 32          | 1           |

**Table S2.** Patient demographics. Clinical characteristics of patients with pre-operative radiographic imaging from The Cancer Genome Atlas database, with confirmed diagnosis of oligodendroglioma (i.e. IDH-mutant, 1p19q co-deleted glioma).

| <b>Characteristic</b>                                    | <b>Total (N=55)</b> |
|----------------------------------------------------------|---------------------|
| <b>Histological subtype – no. (%)</b>                    |                     |
| Oligodendroglioma                                        |                     |
| Grade II                                                 | 23 (41.8)           |
| Grade III                                                | 24 (43.6)           |
| Oligoastrocytoma                                         |                     |
| Grade II                                                 | 5 (9.1)             |
| Grade III                                                | 1 (1.8)             |
| Astrocytoma                                              |                     |
| Grade II                                                 | 1 (1.8)             |
| Grade III                                                | 0 (0.0)             |
| <b>Age at diagnosis (yrs)</b>                            |                     |
| Mean                                                     | 49.4 ± 13.2         |
| Range                                                    | 20–75               |
| <b>Radiographic features present – no./total no. (%)</b> |                     |
| - Contrast-enhanced                                      | 20/55 (36.4)        |
| + Contrast-enhanced                                      | 35/55 (63.6)        |
| <b>Tumor location – no./total no. (%)</b>                |                     |
| Frontal lobe                                             | 40/55 (72.7)        |
| Parietal lobe                                            | 7/55 (12.7)         |
| Temporal lobe                                            | 3/55 (5.5)          |
| Other                                                    | 5/55 (9.1)          |

**Table S3. Complete survival tables.** Cox proportional hazard models for overall survival (OS) and progression-free survival (PFS); multivariate OS adjusted for grade and age; multivariate PFS adjusted for grade. GTR: gross total resection; mut: mutation; exp.: expression; \*Significant on univariate analysis; †significant on multivariate analysis; ‡gene expression on a log2 scale, such that the hazard ratio is for each doubling of gene expression.

| Predictor                                    | OS Hazard Ratio<br>(95% conf. interval) | P-value           | Adjusted OS Hazard Ratio<br>(95% conf. interval) | P-value      |
|----------------------------------------------|-----------------------------------------|-------------------|--------------------------------------------------|--------------|
| <b>*Age (per 10 yrs)</b>                     | <b>3.64 (2.16-6.11)</b>                 | <b>&lt;0.0001</b> | —                                                | —            |
| Histologic astrocytoma vs. oligodendroglioma | 2.94 (0.046-2.70)                       | 0.31              | —                                                | —            |
| Extent of resection (GTR vs. less than GTR)  | 0.65 (0.24-1.68)                        | 0.37              | —                                                | —            |
| <b>*Grade III (vs. II)</b>                   | <b>6.61 (2.08-20.95)</b>                | <b>0.013</b>      | —                                                | —            |
| <b>**MKI67 exp.</b>                          | <b>1.58 (1.17-2.14)</b>                 | <b>0.0029</b>     | 1.12 (0.84-1.50)                                 | 0.42         |
| <i>ATRX</i> mut.                             | NA                                      | NA                | <0.0001                                          | 0.998        |
| <i>CIC</i> mut.                              | 0.65 (0.27-1.55)                        | 0.33              | 0.44 (0.17-1.15)                                 | 0.095        |
| <i>FUBP1</i> mut.                            | 1.70 (0.63-4.53)                        | 0.31              | 2.60 (0.84-8.00)                                 | 0.096        |
| <i>NOTCH1</i> mut.                           | 1.71 (0.65-4.50)                        | 0.28              | 1.10 (0.37-3.27)                                 | 0.87         |
| <b>†PIK3 mut.</b>                            | 1.97 (0.78-4.97)                        | 0.15              | <b>3.11 (1.02-9.47)</b>                          | <b>0.045</b> |
| <i>RBPJ</i> + <i>NOTCH1</i> mut.             | 1.81 (0.71-4.61)                        | 0.210             | 0.85 (0.30-2.40)                                 | 0.76         |
| <i>TP53</i> mut.                             | 1.36 (0.18-10.33)                       | 0.77              | 1.16 (0.14-9.65)                                 | 0.893        |
| 7p gain                                      | 1.90 (0.42-8.52)                        | 0.44              | 1.23 (0.26-5.68)                                 | 0.795        |
| 11p gain                                     | 2.08 (0.58-7.48)                        | 0.26              | 0.60 (0.16-2.33)                                 | 0.463        |
| 14q loss                                     | 3.04 (0.94-9.77)                        | 0.063             | 1.49 (0.39-5.62)                                 | 0.559        |
| <b>*15q loss</b>                             | <b>3.52 (1.41-8.82)</b>                 | <b>0.007</b>      | 1.48 (0.51-4.30)                                 | 0.47         |
| ‡ <i>HES1</i> exp.                           | 0.60 (0.35-1.05)                        | 0.071             | 0.86 (0.47-1.56)                                 | 0.611        |
| ‡ <i>HES2</i> exp.                           | 1.01 (0.93-1.10)                        | 0.76              | 1.00 (0.89-1.12)                                 | 0.954        |
| †‡ <i>HES5</i> exp.                          | 0.82 (0.65-1.03)                        | 0.086             | <b>0.74 (0.57-0.96)</b>                          | <b>0.024</b> |
| <b>*‡HEY1 exp.</b>                           | <b>0.34 (0.18-0.64)</b>                 | <b>0.0009</b>     | 0.86 (0.38-1.95)                                 | 0.72         |
| <b>*‡HEY2 exp.</b>                           | <b>0.35 (0.21-0.60)</b>                 | <b>0.0001</b>     | 0.79 (0.37-1.68)                                 | 0.54         |

|                                                          | PFS Hazard Ratio<br>(95% conf. interval) | P-value       | Adjusted PFS Hazard Ratio<br>(95% conf. interval) | P-value       |
|----------------------------------------------------------|------------------------------------------|---------------|---------------------------------------------------|---------------|
| Age (per 10 yrs)                                         | 1.12 (0.86-1.66)                         | 0.28          | —                                                 | —             |
| <b>*Histologic astrocytoma vs.<br/>oligodendroglioma</b> | <b>4.77 (1.09-20.78)</b>                 | <b>0.038</b>  | —                                                 | —             |
| Extent of resection (GTR vs.<br>less than GTR)           | 0.66 (0.30-1.44)                         | 0.30          | —                                                 | —             |
| <b>*Grade III (vs. II)</b>                               | <b>2.24 (1.01-4.94)</b>                  | <b>0.046</b>  | —                                                 | —             |
| ‡ <i>MKI67</i> exp.                                      | 1.04 (0.84-1.29)                         | 0.71          | 0.97 (0.78-1.21)                                  | 0.81          |
| <i>ATRX</i> mut.                                         | 2.93 (0.38-22.67)                        | 0.30          | 2.09 (0.27-16.3)                                  | 0.483         |
| <i>CIC</i> mut.                                          | 0.61 (0.29-1.27)                         | 0.18          | 0.58 (0.28-1.20)                                  | 0.140         |
| <b>*<i>FUBP1</i> mut.</b>                                | <b>2.48 (1.14-5.38)</b>                  | <b>0.022</b>  | 2.14 (0.98-4.69)                                  | 0.058         |
| <i>NOTCH1</i> mut.                                       | 2.07 (0.93-4.60)                         | 0.091         | 1.52 (0.66-3.53)                                  | 0.33          |
| <i>PIK3</i> mut.                                         | 1.91 (0.87-4.23)                         | 0.11          | 1.98 (0.89-4.40)                                  | 0.092         |
| <b>*<i>RBPJ</i> + <i>NOTCH1</i> mut.</b>                 | <b>2.47 (1.14-5.34)</b>                  | <b>0.021</b>  | 1.86 (0.82-4.20)                                  | 0.13          |
| <i>TP53</i> mut.                                         | 2.57 (0.60-11.03)                        | 0.21          | 2.57 (0.59-11.26)                                 | 0.211         |
| 7p gain                                                  | 0.55 (0.07-4.11)                         | 0.56          | 0.42 (0.06-3.19)                                  | 0.404         |
| 11p gain                                                 | 1.31 (0.38-4.44)                         | 0.67          | 1.19 (0.35-4.08)                                  | 0.779         |
| <b>**14q loss</b>                                        | <b>3.70 (1.49-9.20)</b>                  | <b>0.010</b>  | <b>3.90 (1.56-9.74)</b>                           | <b>0.0035</b> |
| 15q loss                                                 | 1.75 (.073-4.19)                         | 0.21          | 1.72 (0.70-4.22)                                  | 0.239         |
| ‡ <i>HES1</i> exp.                                       | 0.75 (0.49-1.15)                         | 0.18          | 0.70 (0.45-1.10)                                  | 0.118         |
| ‡ <i>HES2</i> exp.                                       | 1.01 (0.96-1.08)                         | 0.67          | 1.02 (0.95-1.10)                                  | 0.638         |
| †‡ <i>HES5</i> exp.                                      | 0.83 (0.68-1.02)                         | 0.076         | 0.86 (0.71-1.04)                                  | 0.120         |
| <b>*†‡<i>HEY1</i> exp.</b>                               | <b>0.41 (0.23-0.72)</b>                  | <b>0.0022</b> | <b>0.475 (0.26-0.88)</b>                          | <b>0.018</b>  |
| ‡ <i>HEY2</i> exp.                                       | 0.87 (0.53-1.44)                         | 0.59          | 0.96 (0.57-1.61)                                  | 0.869         |

## Supplemental Figures

**Figure S1.** Boxplots of the Monte-Carlo cross validation of the genetic-protein and gene expression survival neural networks. The median c-index of the tested genetic-protein models was 0.8 (+/- 0.124), while the median c-index of the tested gene expression models was 0.752 (+/- 0.196).

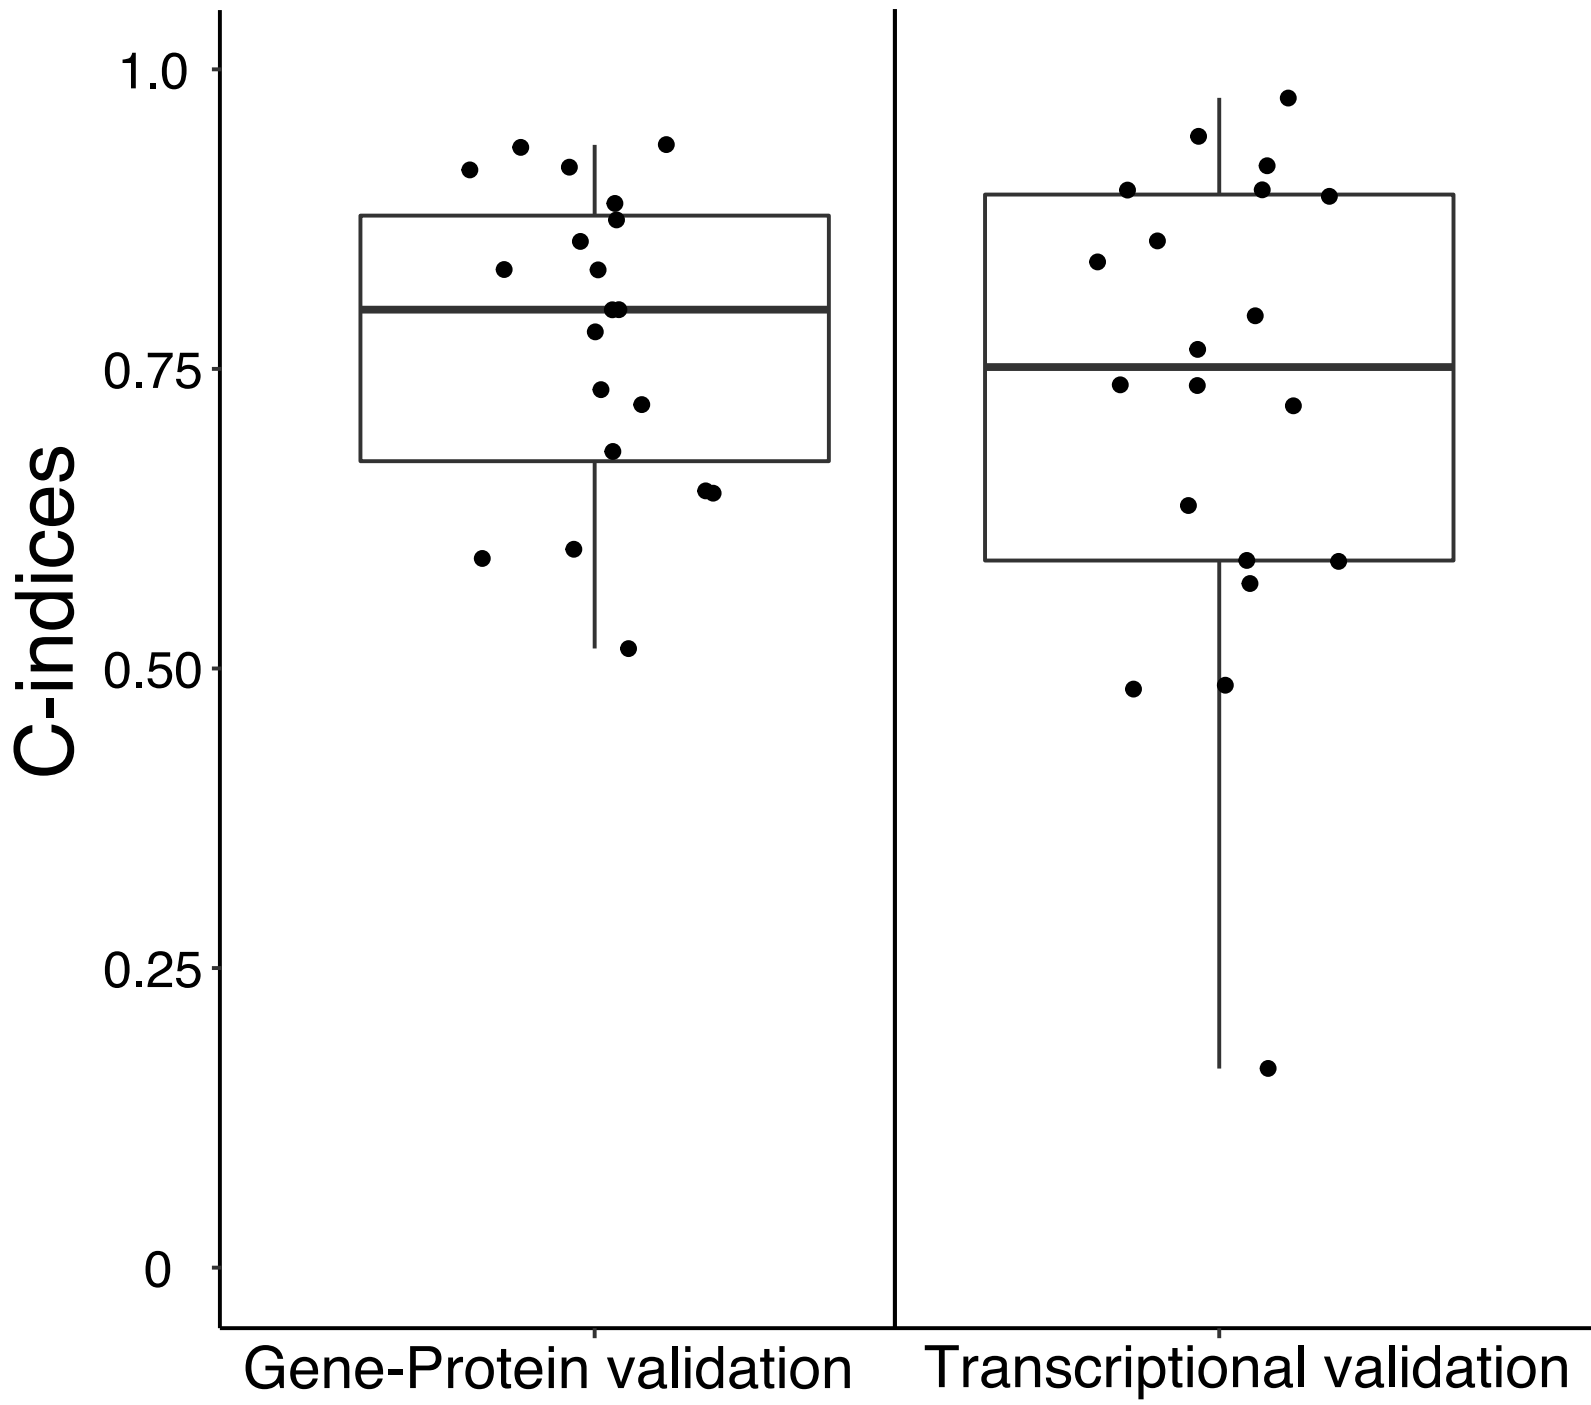

**Figure S2.** A waterfall plot of the most frequent genetic alterations found in oligodendroglioma.



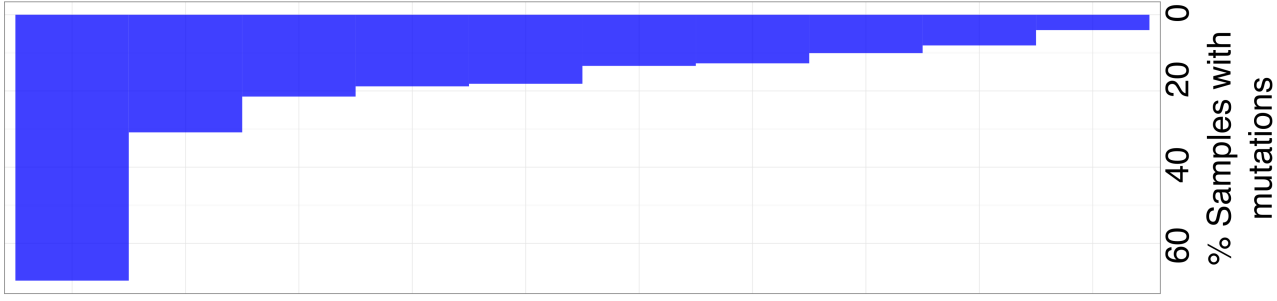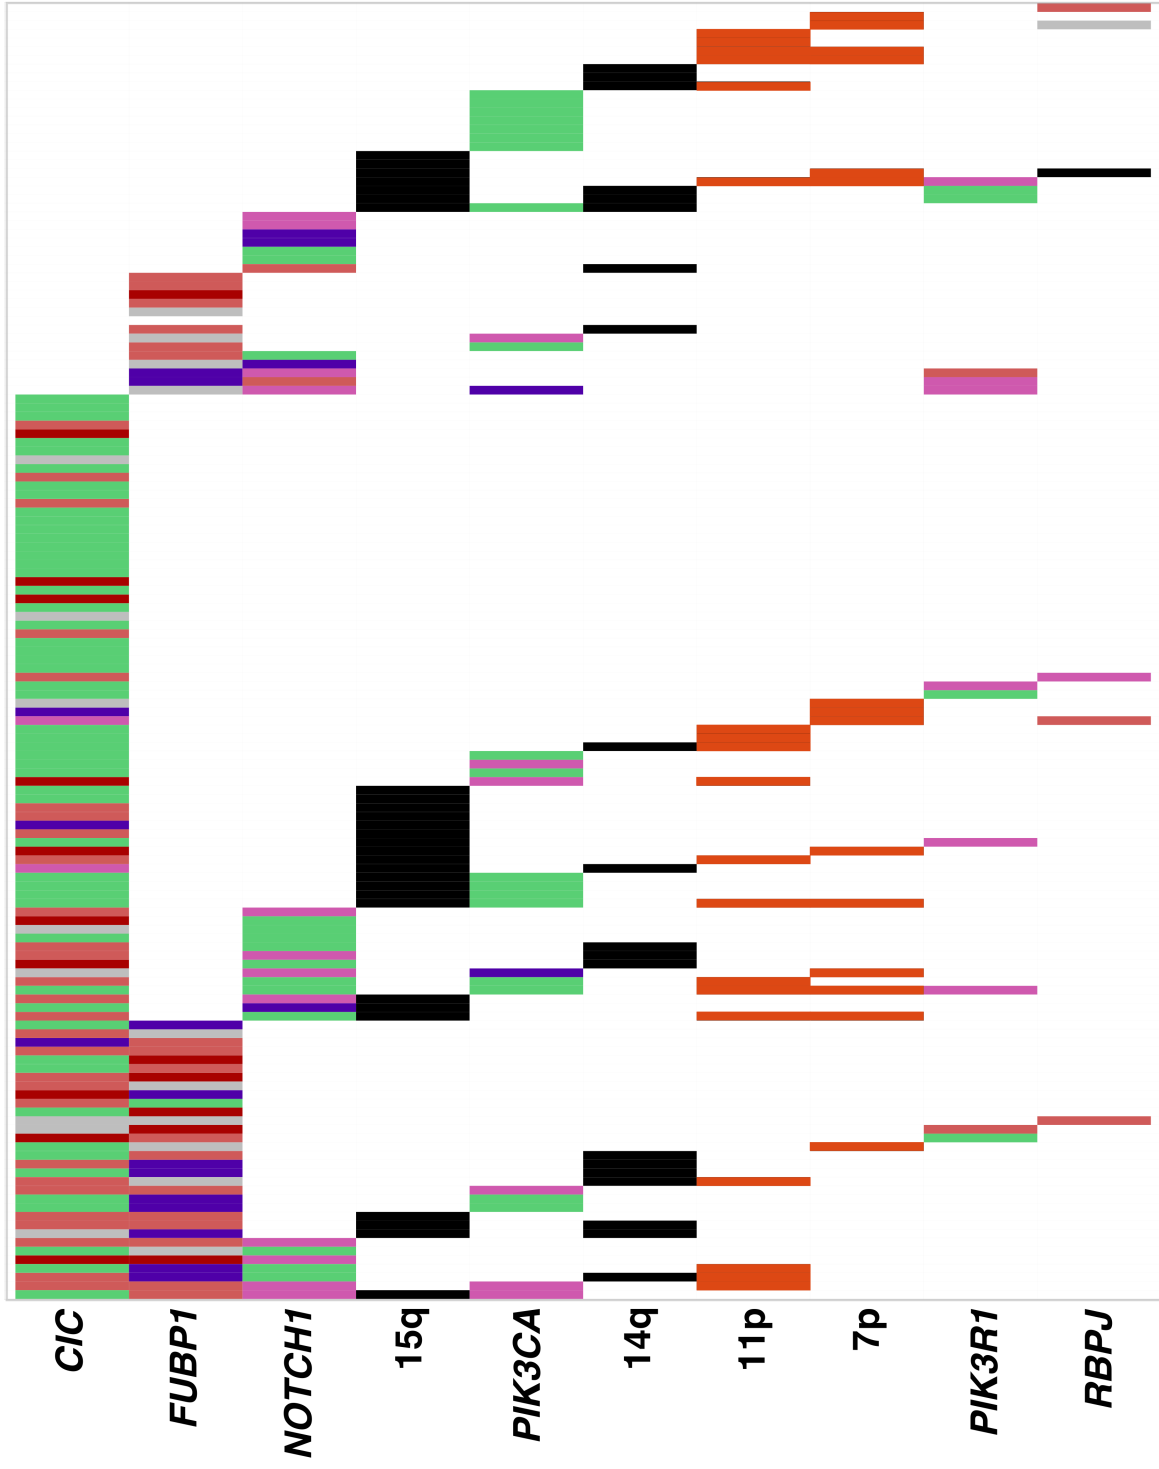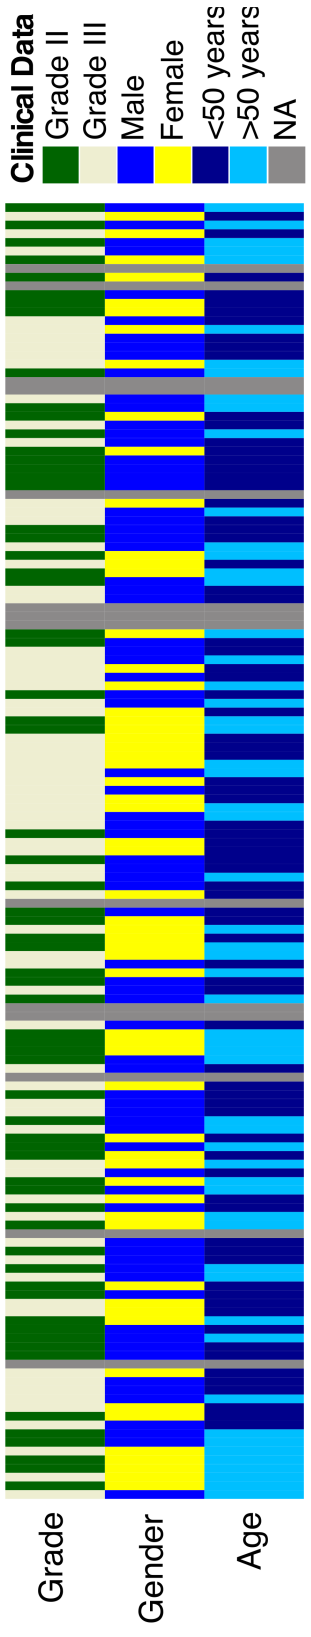

Total samples n = 149

**Figure S3.** Boxplots demonstrating the differential cellular density using nearest neighbor distances between altered and unaltered oligodendrogloma.

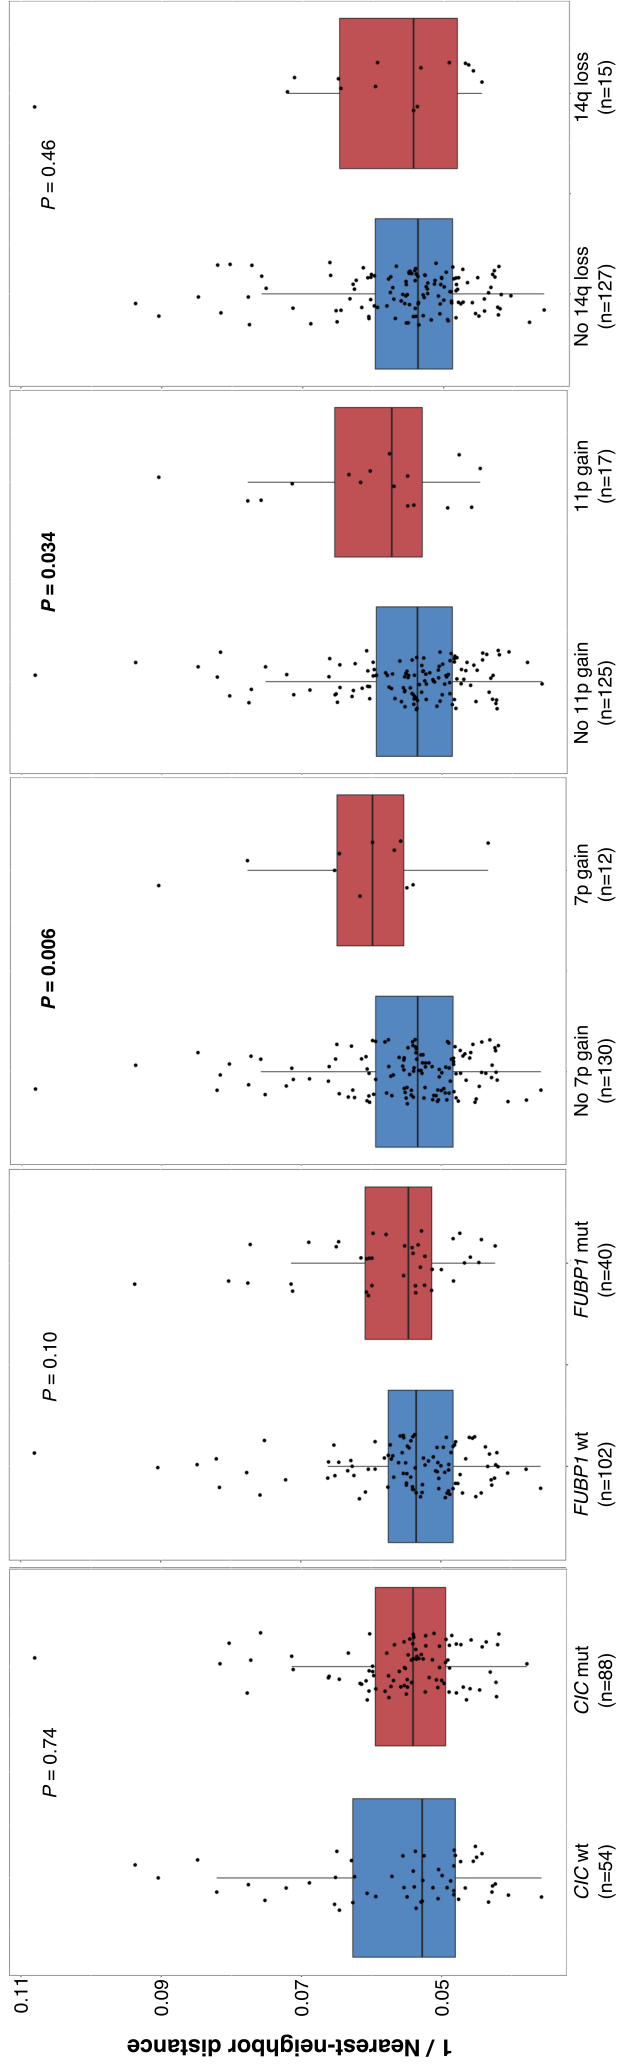

**Figure S4.** Boxplots demonstrating differences in *MKI67* gene expression, and thus cellular proliferation, between altered and unaltered oligodendrogloma.

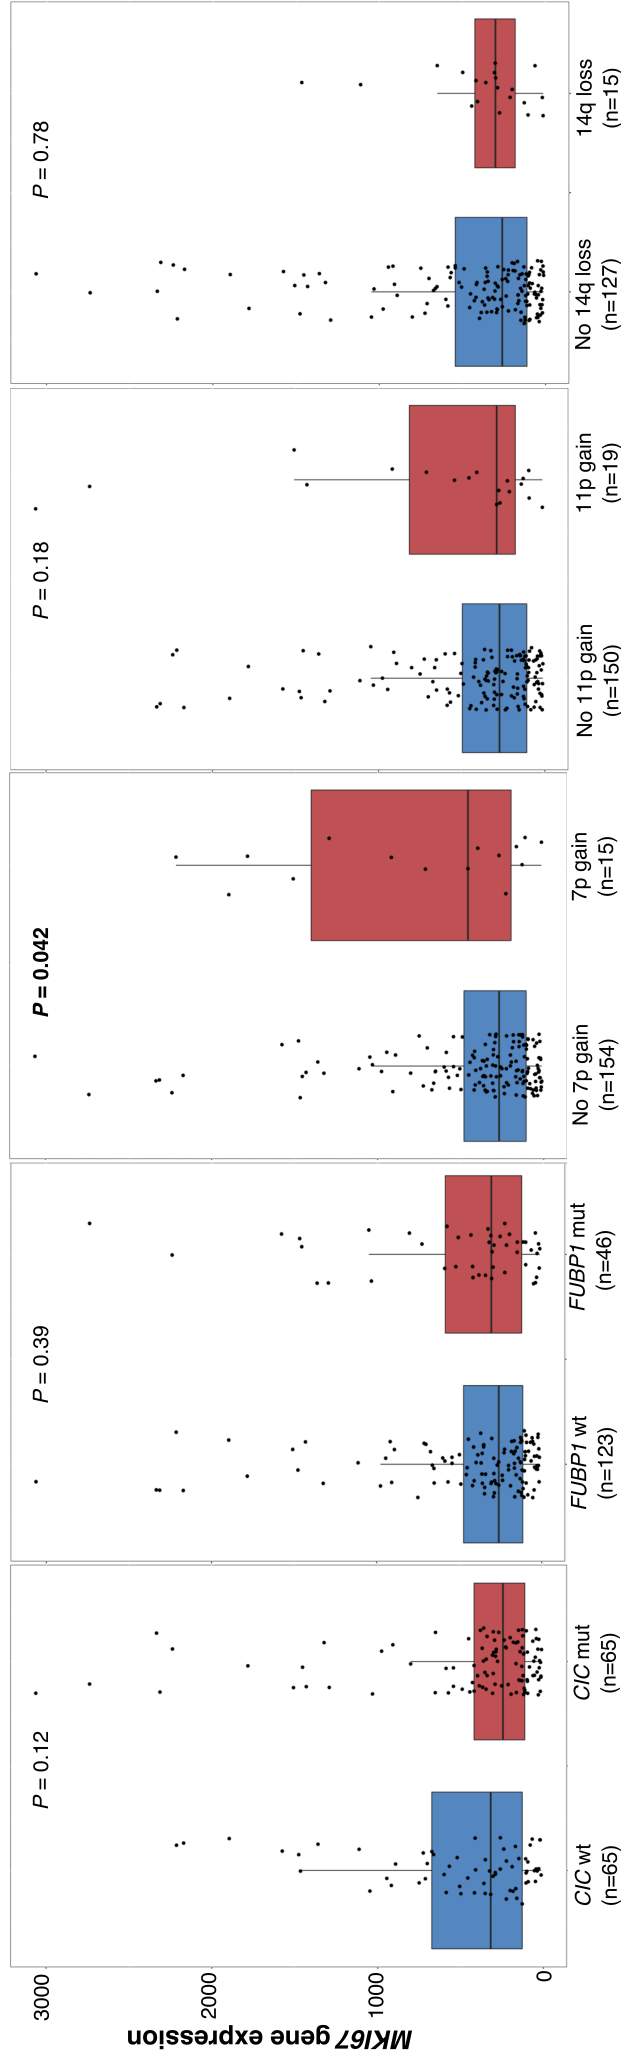

**Figure S5.** Boxplots illustrating differences in gene expression of downstream Notch pathway targets, HES1 and HEY1, between contrast enhancing and non-enhancing oligodendroglioma.

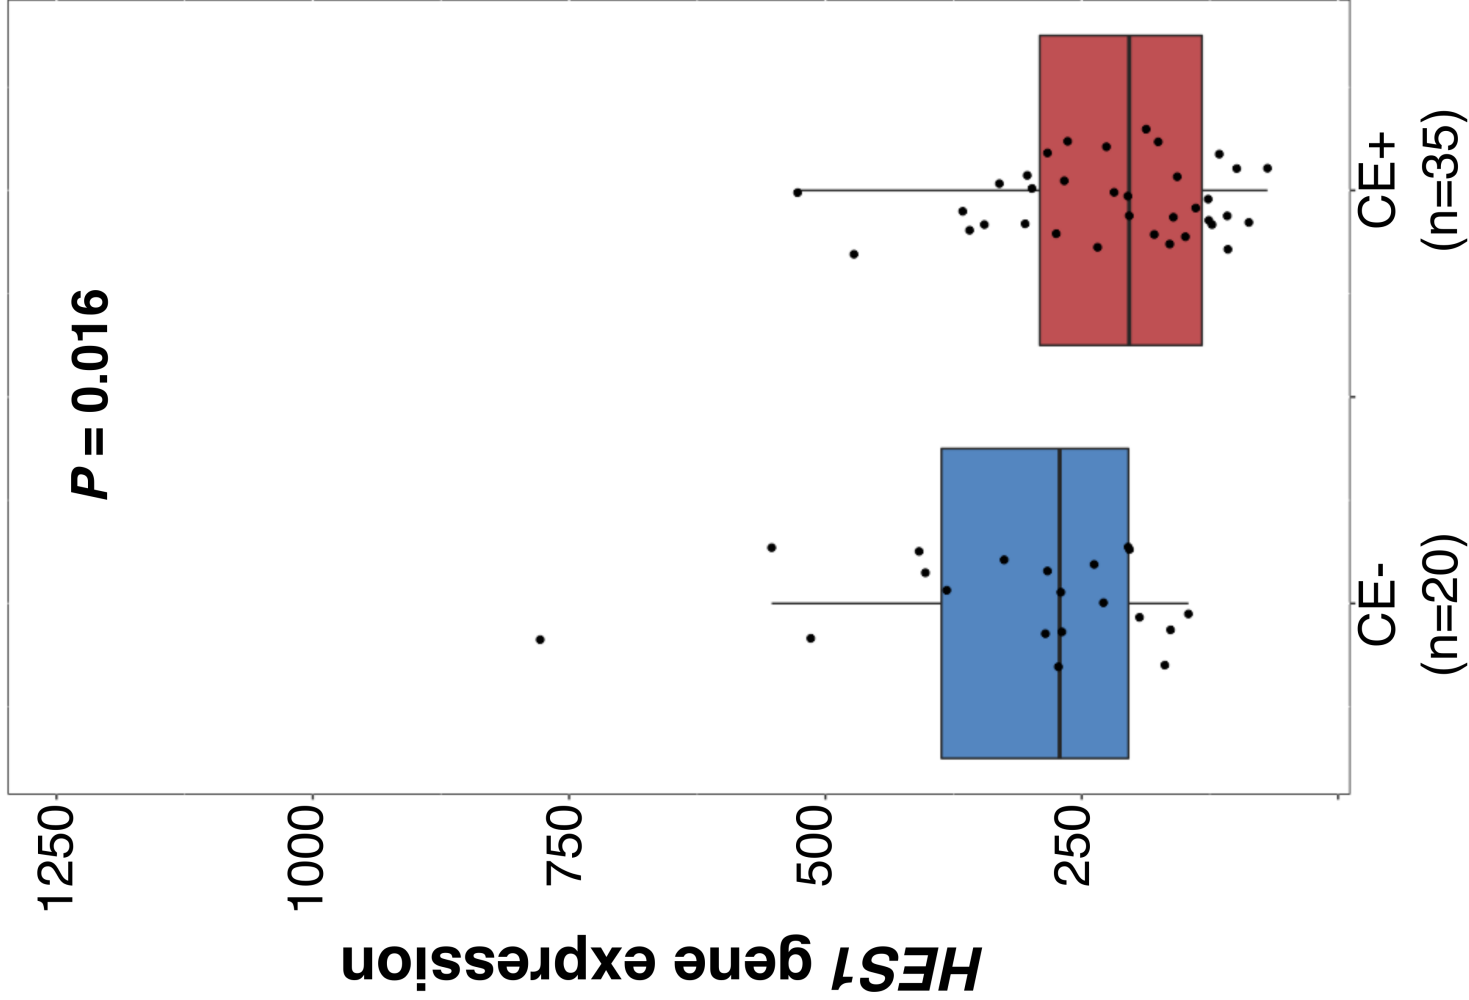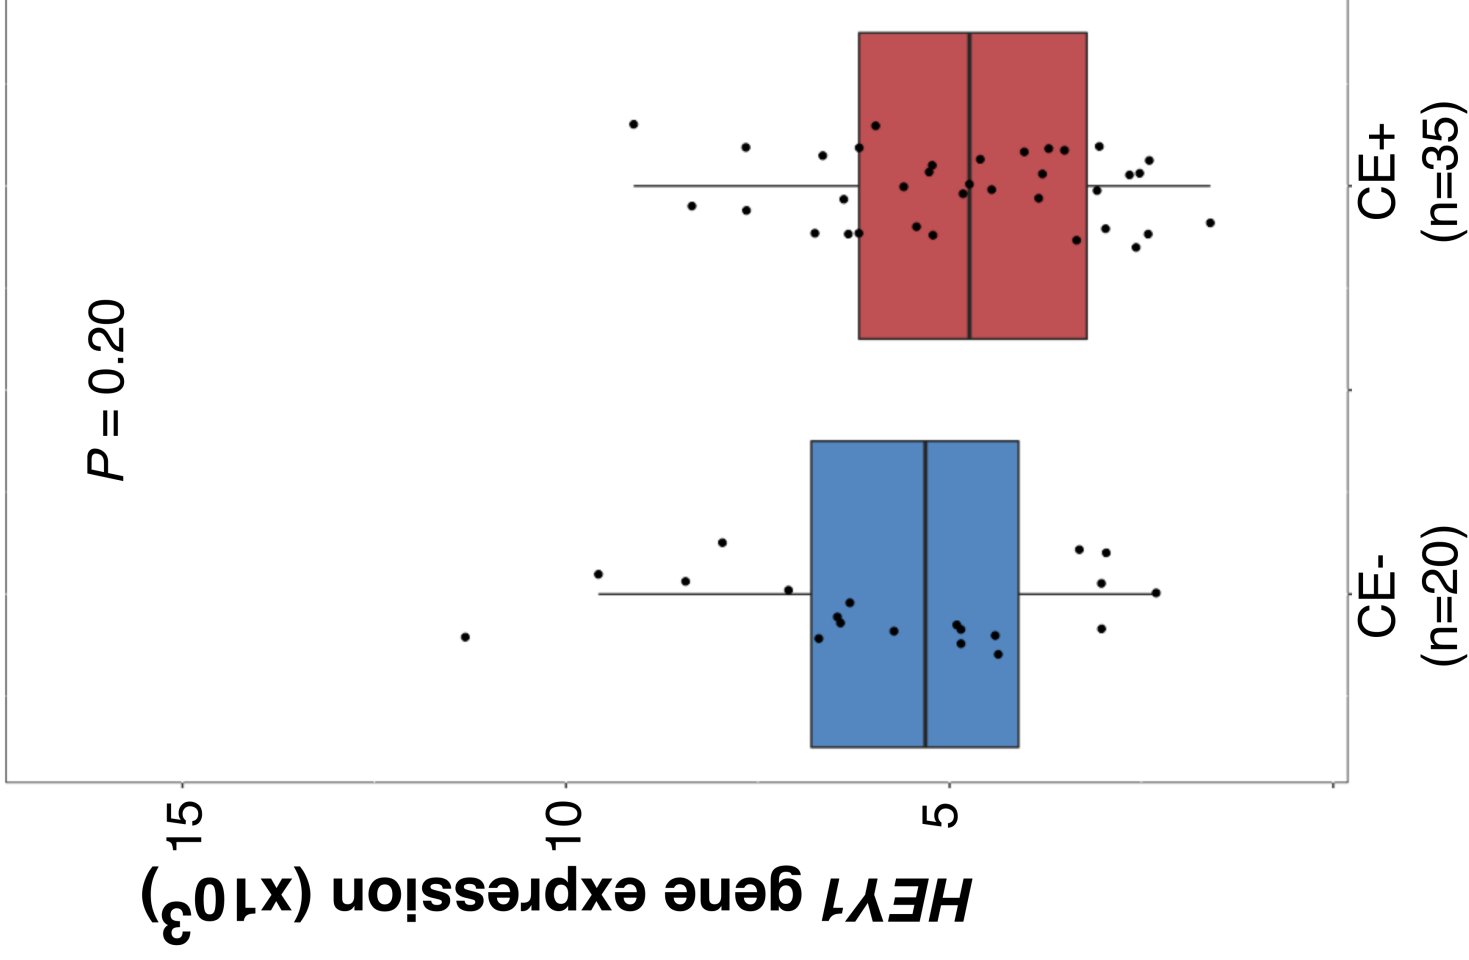

**Figure S6.** Boxplots demonstrating the differences in cellular density and proliferation in tumors with and without RBPJ mutations, and those tumors with both NOTCH1 and RBPJ mutations and without.



**A**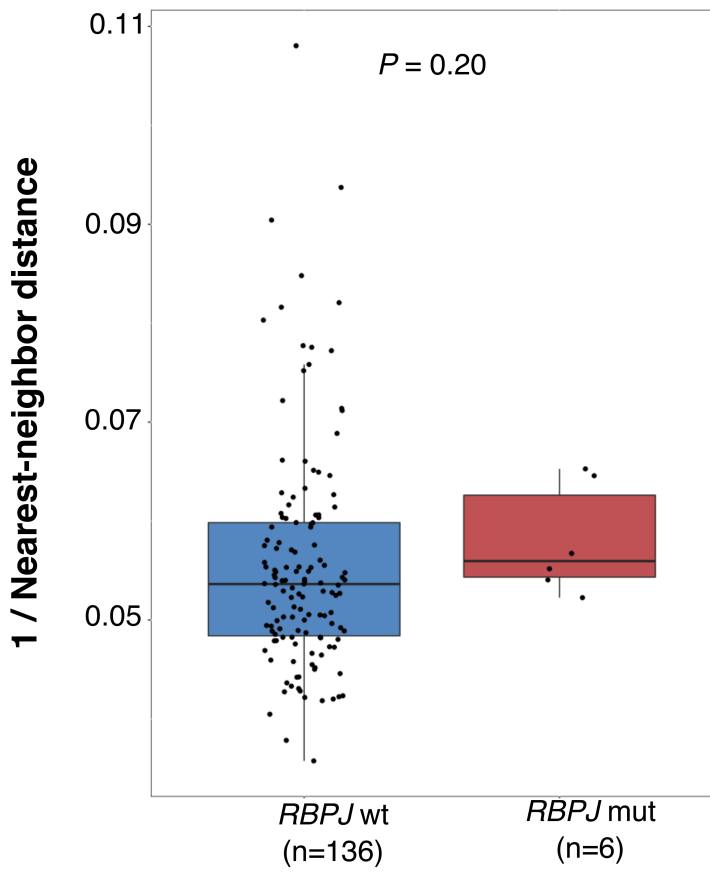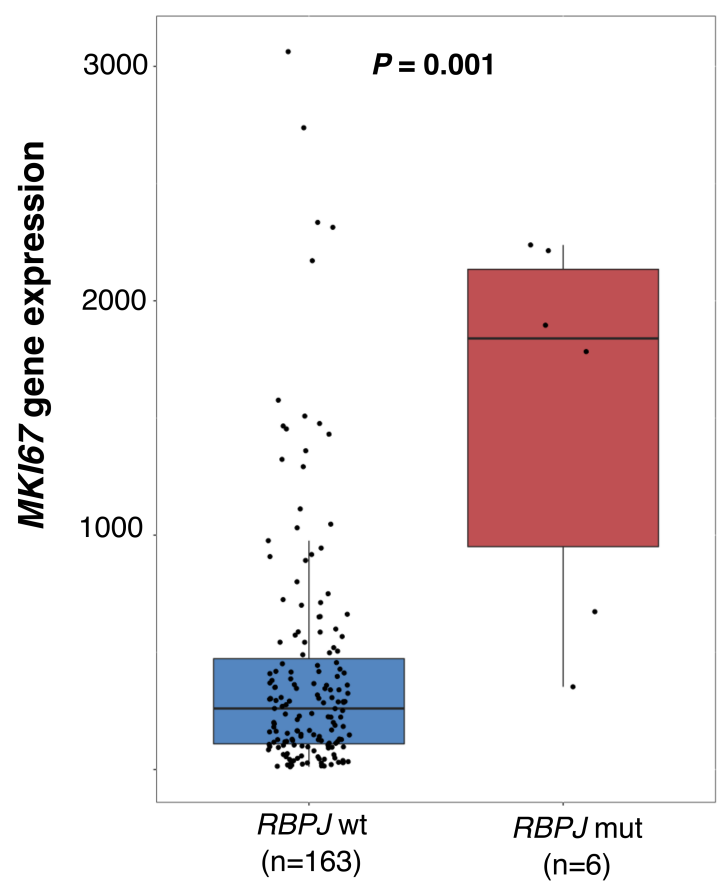**B**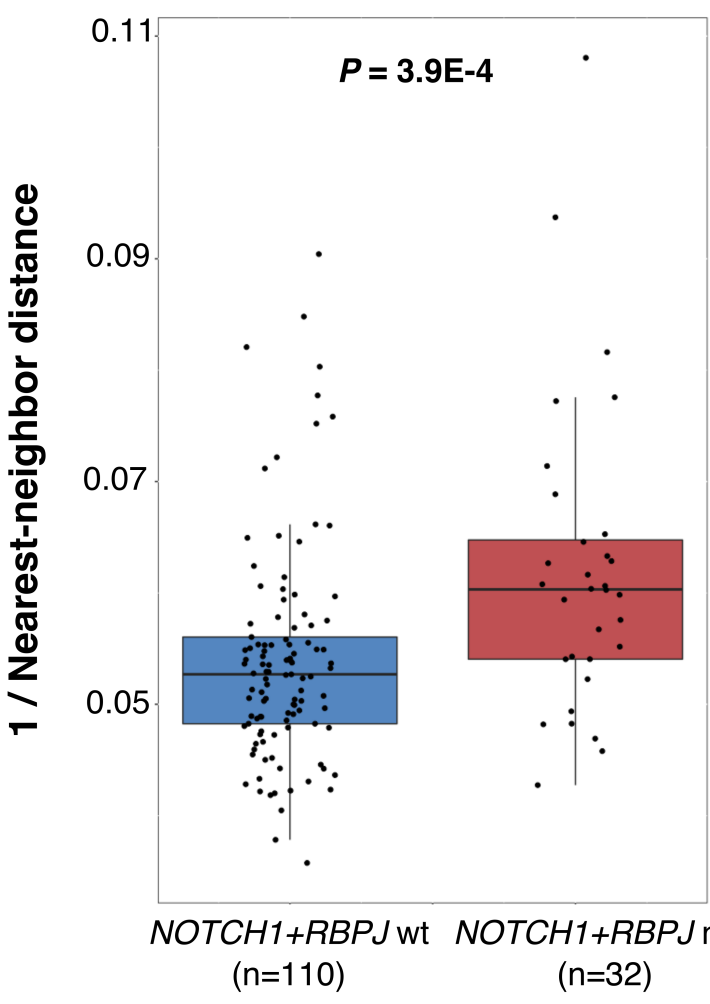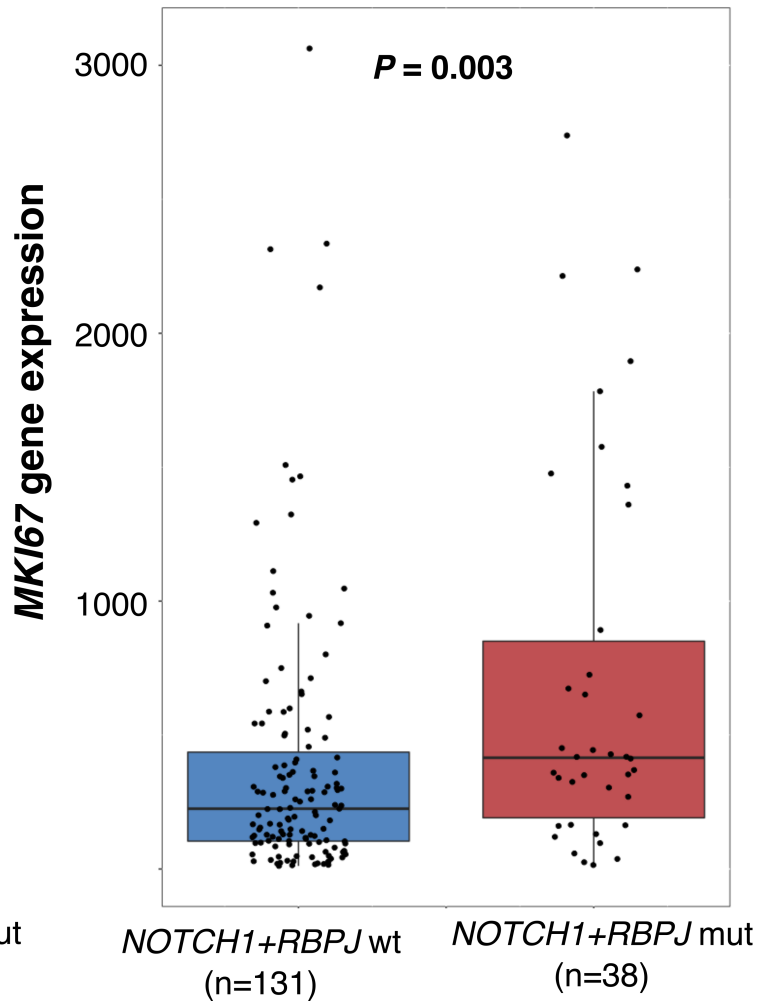

**Figure S7.** Kaplan-Meier plots for overall survival (OS) of the key genetic alterations found in oligodendroglioma. Statistical significance was assessed using log-rank tests.

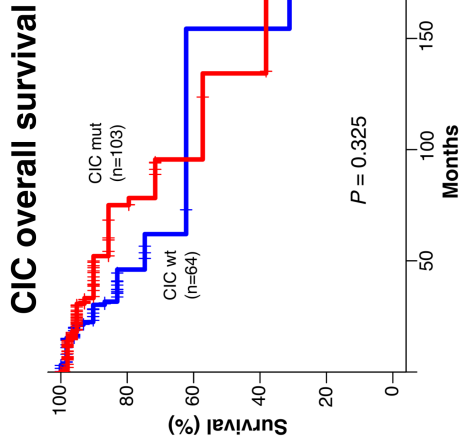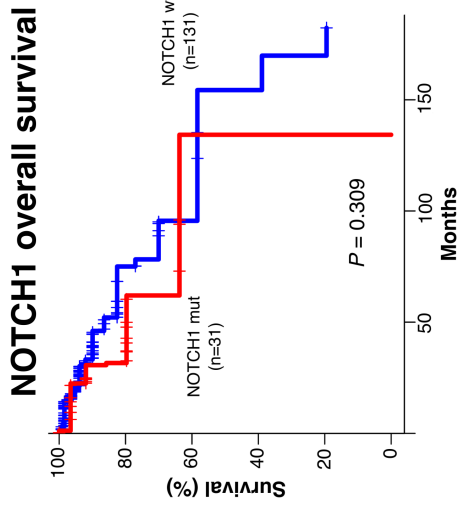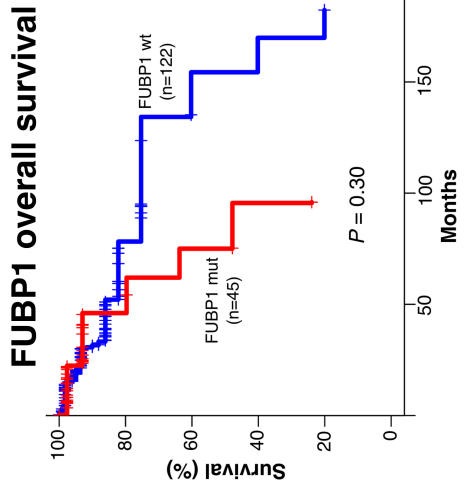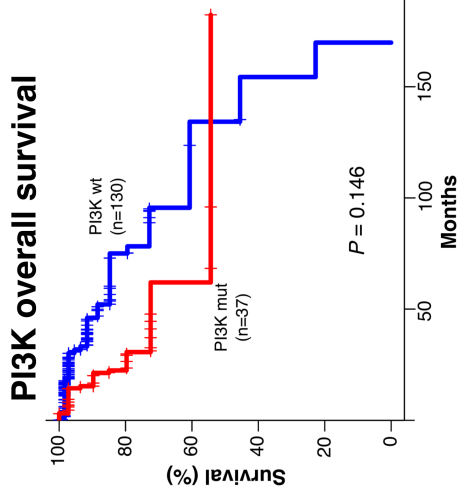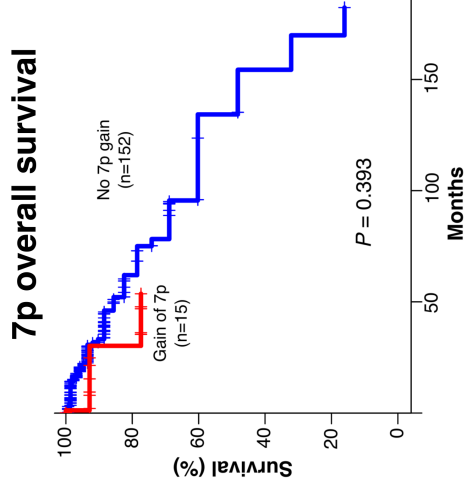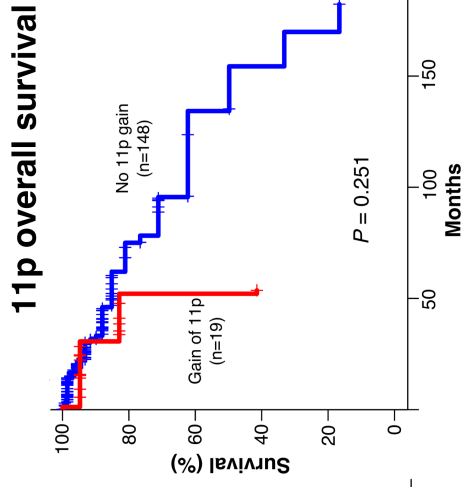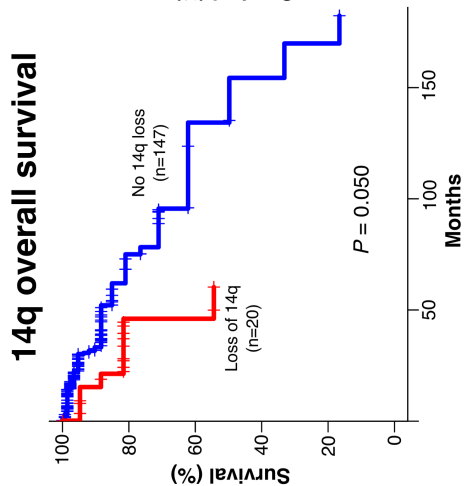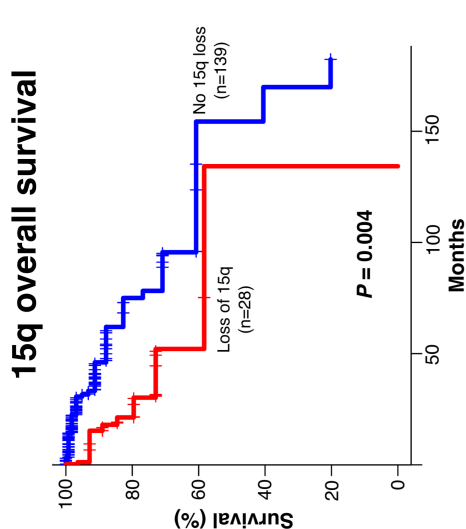

**Figure S8.** Kaplan-Meier plots for progression-free survival (PFS) of the key genetic alterations found in oligodendroglioma. Statistical significance was assessed using log-rank tests.

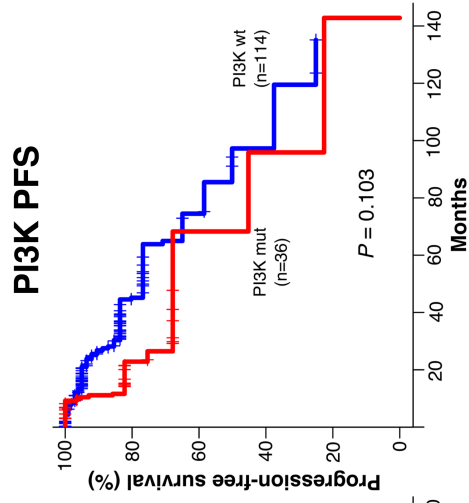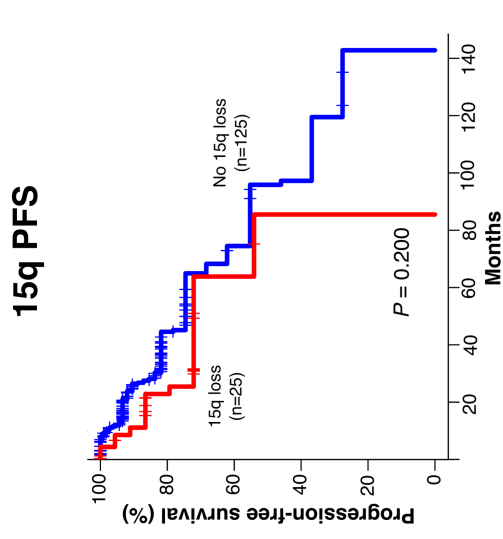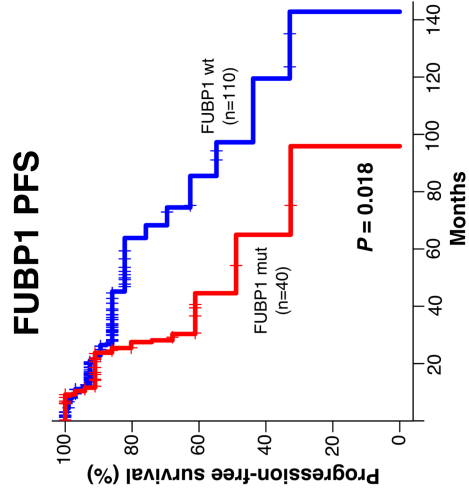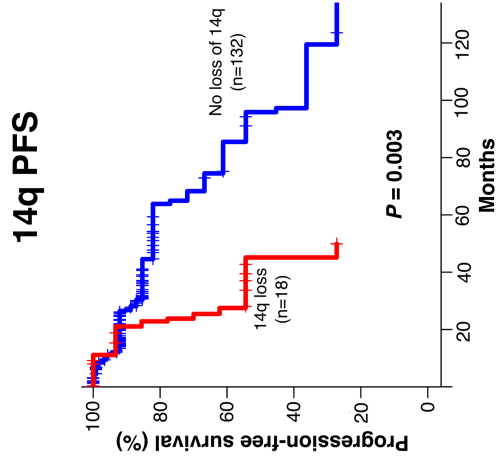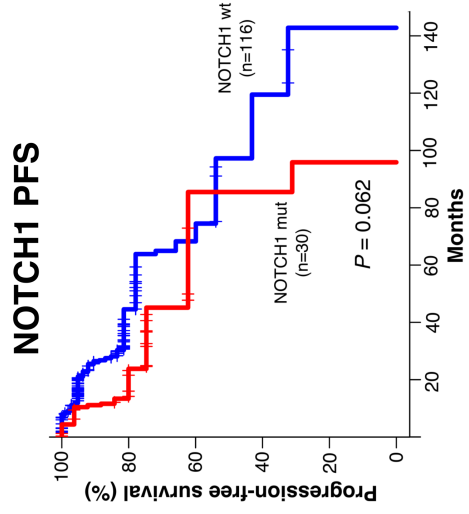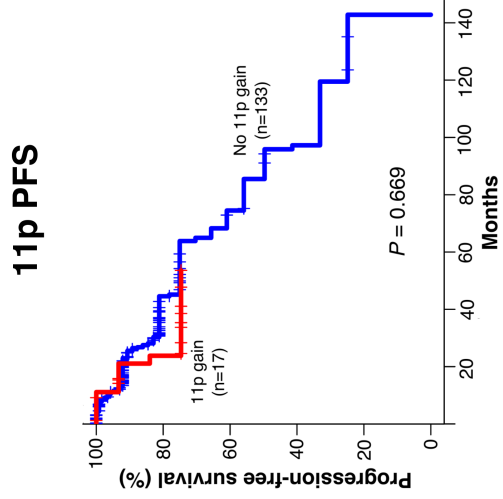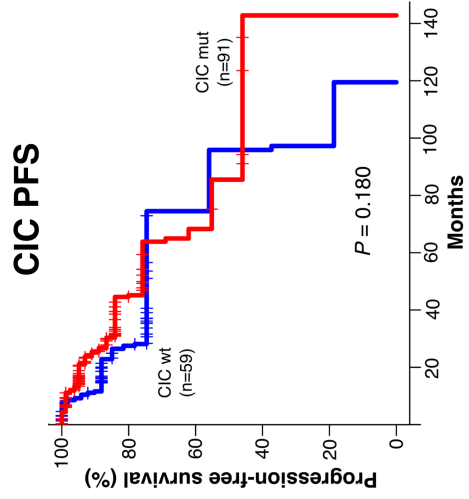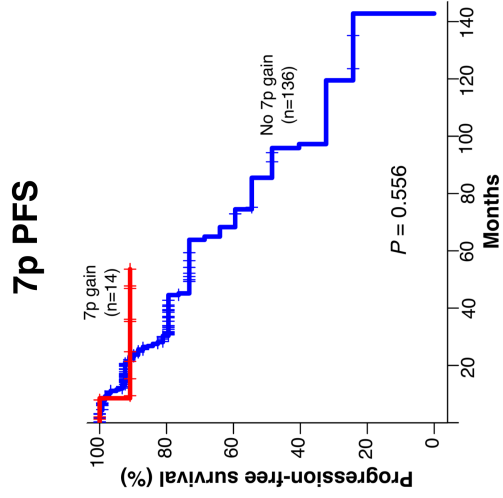

Supplement: 41698_2018_67_MOESM1_ESM.pdf [file 41698_2018_67_MOESM1_ESM.pdf]
